# Supplementary material for: Structure of Hybrid Interpolymeric Complexes of Polyvinyl Alcohol and Halides of Second Group Elements
Source: Hindawi journal article supplement (doi:10.1155/2017/4931082), 2017-01-01
Supplement: f1 [file 4931082.f1.zip]

Archive with 2 entries (2 files):
- 2PVAZnCl2.mol
- 2PVACdCl2.mol
