# Supplementary material for: Structure of Hybrid Interpolymeric Complexes of Polyvinyl Alcohol and Halides of Second Group Elements
Source: Hindawi journal article supplement (doi:10.1155/2017/4931082), 2017-01-01
Supplement: f1 [file 4931082.f1.zip › 2PVACdCl2.mol]

Title 2PVA8,5+6CdCl2

Created by GaussView 5.0.8
142126  0  0  0  0  0  0  0  0  0    0
   -6.8476   -5.0513    0.4668 C   0  0  0  0  0  0  0  0  0  0  0  0
   -7.0616   -5.5182    1.4299 H   0  0  0  0  0  0  0  0  0  0  0  0
   -5.3398   -4.7887    0.3378 C   0  0  0  0  0  0  0  0  0  0  0  0
   -4.9849   -4.4033    1.2965 H   0  0  0  0  0  0  0  0  0  0  0  0
   -5.1395   -4.0245   -0.4183 H   0  0  0  0  0  0  0  0  0  0  0  0
   -4.5837   -6.0578   -0.0461 C   0  0  0  0  0  0  0  0  0  0  0  0
   -5.0298   -6.8876    0.5086 H   0  0  0  0  0  0  0  0  0  0  0  0
   -3.0760   -6.0718    0.2112 C   0  0  0  0  0  0  0  0  0  0  0  0
   -2.8490   -5.5625    1.1521 H   0  0  0  0  0  0  0  0  0  0  0  0
   -2.5824   -5.5174   -0.5924 H   0  0  0  0  0  0  0  0  0  0  0  0
   -2.5122   -7.4976    0.3071 C   0  0  0  0  0  0  0  0  0  0  0  0
   -2.7530   -7.9062    1.2942 H   0  0  0  0  0  0  0  0  0  0  0  0
   -0.9983   -7.5202    0.1072 C   0  0  0  0  0  0  0  0  0  0  0  0
   -0.5550   -6.8239    0.8263 H   0  0  0  0  0  0  0  0  0  0  0  0
   -0.7661   -7.1358   -0.8918 H   0  0  0  0  0  0  0  0  0  0  0  0
   -0.3209   -8.8789    0.2829 C   0  0  0  0  0  0  0  0  0  0  0  0
   -0.5680   -9.2875    1.2659 H   0  0  0  0  0  0  0  0  0  0  0  0
    1.2090   -8.7641    0.1552 C   0  0  0  0  0  0  0  0  0  0  0  0
    1.5931   -8.3719    1.0991 H   0  0  0  0  0  0  0  0  0  0  0  0
    1.4704   -8.0462   -0.6284 H   0  0  0  0  0  0  0  0  0  0  0  0
    1.8792  -10.0943   -0.1703 C   0  0  0  0  0  0  0  0  0  0  0  0
    1.4331  -10.8676    0.4611 H   0  0  0  0  0  0  0  0  0  0  0  0
    3.3944  -10.1253    0.0147 C   0  0  0  0  0  0  0  0  0  0  0  0
    3.6665   -9.5958    0.9320 H   0  0  0  0  0  0  0  0  0  0  0  0
    3.8544   -9.5914   -0.8222 H   0  0  0  0  0  0  0  0  0  0  0  0
    3.9647  -11.5468    0.1180 C   0  0  0  0  0  0  0  0  0  0  0  0
    3.7537  -11.9434    1.1164 H   0  0  0  0  0  0  0  0  0  0  0  0
    5.4702  -11.5383   -0.1226 C   0  0  0  0  0  0  0  0  0  0  0  0
    5.9038  -10.7910    0.5494 H   0  0  0  0  0  0  0  0  0  0  0  0
    5.6617  -11.1907   -1.1434 H   0  0  0  0  0  0  0  0  0  0  0  0
    6.2260  -12.8478    0.0950 C   0  0  0  0  0  0  0  0  0  0  0  0
    6.0190  -13.2361    1.0956 H   0  0  0  0  0  0  0  0  0  0  0  0
    7.7366  -12.6070   -0.0582 C   0  0  0  0  0  0  0  0  0  0  0  0
    8.0752  -12.0881    0.8416 H   0  0  0  0  0  0  0  0  0  0  0  0
    7.9187  -11.9405   -0.9068 H   0  0  0  0  0  0  0  0  0  0  0  0
    8.5687  -13.8659   -0.2646 C   0  0  0  0  0  0  0  0  0  0  0  0
    8.3010  -14.6017    0.5046 H   0  0  0  0  0  0  0  0  0  0  0  0
   10.0782  -13.6365   -0.2174 C   0  0  0  0  0  0  0  0  0  0  0  0
   10.3371  -13.0708    0.6821 H   0  0  0  0  0  0  0  0  0  0  0  0
   10.3743  -13.0336   -1.0807 H   0  0  0  0  0  0  0  0  0  0  0  0
   10.8664  -14.9407   -0.1930 C   0  0  0  0  0  0  0  0  0  0  0  0
   11.9407  -14.7323   -0.2146 H   0  0  0  0  0  0  0  0  0  0  0  0
   10.6476  -15.4895    0.7289 H   0  0  0  0  0  0  0  0  0  0  0  0
   -7.3594   -5.9304   -0.5559 O   0  0  0  0  0  0  0  0  0  0  0  0
   -6.6383   -6.0979   -1.1970 H   0  0  0  0  0  0  0  0  0  0  0  0
   -4.8480   -6.2287   -1.4528 O   0  0  0  0  0  0  0  0  0  0  0  0
   -4.5651   -7.1209   -1.6999 H   0  0  0  0  0  0  0  0  0  0  0  0
   -3.1793   -8.3401   -0.6689 O   0  0  0  0  0  0  0  0  0  0  0  0
   -2.5299   -8.9793   -1.0122 H   0  0  0  0  0  0  0  0  0  0  0  0
   -0.8719   -9.8252   -0.6778 O   0  0  0  0  0  0  0  0  0  0  0  0
   -0.1586  -10.0663   -1.3124 H   0  0  0  0  0  0  0  0  0  0  0  0
    1.5424  -10.3527   -1.5503 O   0  0  0  0  0  0  0  0  0  0  0  0
    1.8610  -11.2401   -1.7726 H   0  0  0  0  0  0  0  0  0  0  0  0
    3.2756  -12.4077   -0.8263 O   0  0  0  0  0  0  0  0  0  0  0  0
    3.9152  -13.0274   -1.2119 H   0  0  0  0  0  0  0  0  0  0  0  0
    5.7292  -13.8577   -0.8366 O   0  0  0  0  0  0  0  0  0  0  0  0
    6.4870  -14.1511   -1.3949 H   0  0  0  0  0  0  0  0  0  0  0  0
    8.1828  -14.3731   -1.5573 O   0  0  0  0  0  0  0  0  0  0  0  0
    8.8353  -15.0506   -1.8110 H   0  0  0  0  0  0  0  0  0  0  0  0
   10.5020  -15.7368   -1.3292 O   0  0  0  0  0  0  0  0  0  0  0  0
   10.6671  -16.6737   -1.1370 H   0  0  0  0  0  0  0  0  0  0  0  0
  -10.9307   -9.8745   -1.9564 C   0  0  0  0  0  0  0  0  0  0  0  0
  -10.4608   -9.9799   -2.9365 H   0  0  0  0  0  0  0  0  0  0  0  0
  -10.6505  -11.1254   -1.1214 C   0  0  0  0  0  0  0  0  0  0  0  0
  -11.0139  -11.9832   -1.6966 H   0  0  0  0  0  0  0  0  0  0  0  0
  -11.2133  -11.1018   -0.1845 H   0  0  0  0  0  0  0  0  0  0  0  0
   -9.1689  -11.3110   -0.7970 C   0  0  0  0  0  0  0  0  0  0  0  0
   -8.5780  -10.9287   -1.6372 H   0  0  0  0  0  0  0  0  0  0  0  0
   -8.7376  -12.7585   -0.5424 C   0  0  0  0  0  0  0  0  0  0  0  0
   -9.1165  -13.3868   -1.3542 H   0  0  0  0  0  0  0  0  0  0  0  0
   -9.1833  -13.1207    0.3898 H   0  0  0  0  0  0  0  0  0  0  0  0
   -7.2168  -12.9212   -0.4967 C   0  0  0  0  0  0  0  0  0  0  0  0
   -6.8031  -12.5793   -1.4504 H   0  0  0  0  0  0  0  0  0  0  0  0
   -6.7582  -14.3682   -0.2683 C   0  0  0  0  0  0  0  0  0  0  0  0
   -6.9520  -14.9307   -1.1841 H   0  0  0  0  0  0  0  0  0  0  0  0
   -7.3345  -14.8355    0.5361 H   0  0  0  0  0  0  0  0  0  0  0  0
   -5.2734  -14.4289    0.0862 C   0  0  0  0  0  0  0  0  0  0  0  0
   -4.7509  -13.7073   -0.5492 H   0  0  0  0  0  0  0  0  0  0  0  0
   -4.5892  -15.7854   -0.0676 C   0  0  0  0  0  0  0  0  0  0  0  0
   -4.9575  -16.2911   -0.9646 H   0  0  0  0  0  0  0  0  0  0  0  0
   -4.8492  -16.4079    0.7936 H   0  0  0  0  0  0  0  0  0  0  0  0
   -3.0653  -15.6582   -0.1971 C   0  0  0  0  0  0  0  0  0  0  0  0
   -2.8271  -15.2996   -1.2049 H   0  0  0  0  0  0  0  0  0  0  0  0
   -2.3724  -16.9987    0.0361 C   0  0  0  0  0  0  0  0  0  0  0  0
   -2.8313  -17.7334   -0.6333 H   0  0  0  0  0  0  0  0  0  0  0  0
   -2.5741  -17.3313    1.0599 H   0  0  0  0  0  0  0  0  0  0  0  0
   -0.8641  -17.0174   -0.2023 C   0  0  0  0  0  0  0  0  0  0  0  0
   -0.6492  -16.6590   -1.2124 H   0  0  0  0  0  0  0  0  0  0  0  0
   -0.2861  -18.4341   -0.0382 C   0  0  0  0  0  0  0  0  0  0  0  0
   -0.5191  -18.9961   -0.9448 H   0  0  0  0  0  0  0  0  0  0  0  0
   -0.7702  -18.9470    0.7988 H   0  0  0  0  0  0  0  0  0  0  0  0
    1.2190  -18.4313    0.2057 C   0  0  0  0  0  0  0  0  0  0  0  0
    1.6756  -17.7114   -0.4805 H   0  0  0  0  0  0  0  0  0  0  0  0
    1.9200  -19.7786    0.0293 C   0  0  0  0  0  0  0  0  0  0  0  0
    1.4923  -20.3128   -0.8236 H   0  0  0  0  0  0  0  0  0  0  0  0
    1.7426  -20.3848    0.9223 H   0  0  0  0  0  0  0  0  0  0  0  0
    3.4214  -19.6242   -0.2269 C   0  0  0  0  0  0  0  0  0  0  0  0
    3.5642  -19.2407   -1.2436 H   0  0  0  0  0  0  0  0  0  0  0  0
    4.1644  -20.9524   -0.0959 C   0  0  0  0  0  0  0  0  0  0  0  0
    3.6605  -21.6847   -0.7344 H   0  0  0  0  0  0  0  0  0  0  0  0
    4.0788  -21.3226    0.9314 H   0  0  0  0  0  0  0  0  0  0  0  0
    5.6260  -20.9121   -0.5164 C   0  0  0  0  0  0  0  0  0  0  0  0
    6.0567  -21.9140   -0.5416 H   0  0  0  0  0  0  0  0  0  0  0  0
    5.7329  -20.4686   -1.5056 H   0  0  0  0  0  0  0  0  0  0  0  0
  -10.4015   -8.6644   -1.4191 O   0  0  0  0  0  0  0  0  0  0  0  0
  -10.9029   -8.3665   -0.6402 H   0  0  0  0  0  0  0  0  0  0  0  0
   -8.8837  -10.5017    0.3616 O   0  0  0  0  0  0  0  0  0  0  0  0
   -8.0798  -10.8575    0.7794 H   0  0  0  0  0  0  0  0  0  0  0  0
   -6.6648  -12.0310    0.5123 O   0  0  0  0  0  0  0  0  0  0  0  0
   -6.1486  -12.5706    1.1546 H   0  0  0  0  0  0  0  0  0  0  0  0
   -5.2004  -13.9876    1.4581 O   0  0  0  0  0  0  0  0  0  0  0  0
   -4.2654  -13.8669    1.6831 H   0  0  0  0  0  0  0  0  0  0  0  0
   -2.5970  -14.6496    0.7320 O   0  0  0  0  0  0  0  0  0  0  0  0
   -1.7197  -14.9152    1.0575 H   0  0  0  0  0  0  0  0  0  0  0  0
   -0.2197  -16.0659    0.6901 O   0  0  0  0  0  0  0  0  0  0  0  0
    0.3370  -16.5729    1.3239 H   0  0  0  0  0  0  0  0  0  0  0  0
    1.3746  -17.9610    1.5605 O   0  0  0  0  0  0  0  0  0  0  0  0
    2.3169  -17.8046    1.7210 H   0  0  0  0  0  0  0  0  0  0  0  0
    3.9453  -18.6199    0.6773 O   0  0  0  0  0  0  0  0  0  0  0  0
    4.8458  -18.8571    0.9397 H   0  0  0  0  0  0  0  0  0  0  0  0
    6.4205  -20.0794    0.3744 O   0  0  0  0  0  0  0  0  0  0  0  0
    6.7863  -20.6153    1.0877 H   0  0  0  0  0  0  0  0  0  0  0  0
    7.7794  -18.0883   -0.3070 Cd  0  0  0  0  0  0  0  0  0  0  0  0
    4.6938  -16.0266   -0.1665 Cd  0  0  0  0  0  0  0  0  0  0  0  0
    1.3800  -14.1984   -0.0440 Cd  0  0  0  0  0  0  0  0  0  0  0  0
   -8.3024   -8.1102    0.0716 Cd  0  0  0  0  0  0  0  0  0  0  0  0
   10.0324  -18.8390   -0.3592 Cl  0  0  0  0  0  0  0  0  0  0  0  0
    6.6610  -16.7313    1.4995 Cl  0  0  0  0  0  0  0  0  0  0  0  0
    6.0768  -17.4353   -1.9959 Cl  0  0  0  0  0  0  0  0  0  0  0  0
    3.2496  -14.9976    1.6704 Cl  0  0  0  0  0  0  0  0  0  0  0  0
    2.7571  -15.6264   -1.8002 Cl  0  0  0  0  0  0  0  0  0  0  0  0
    0.1286  -12.7728    1.6849 Cl  0  0  0  0  0  0  0  0  0  0  0  0
   -6.6460   -9.0486   -1.7884 Cl  0  0  0  0  0  0  0  0  0  0  0  0
  -10.1885   -7.1476    1.2861 Cl  0  0  0  0  0  0  0  0  0  0  0  0
   -5.0460  -10.0855   -0.0137 Cd  0  0  0  0  0  0  0  0  0  0  0  0
   -1.8178  -12.1231   -0.0323 Cd  0  0  0  0  0  0  0  0  0  0  0  0
   -6.3353   -8.7953    1.7854 Cl  0  0  0  0  0  0  0  0  0  0  0  0
   -3.7034  -11.5651   -1.7384 Cl  0  0  0  0  0  0  0  0  0  0  0  0
   -3.2715  -11.0362    1.7544 Cl  0  0  0  0  0  0  0  0  0  0  0  0
   -0.3178  -13.3661   -1.7923 Cl  0  0  0  0  0  0  0  0  0  0  0  0
  -12.0088   -9.7694   -2.1185 H   0  0  0  0  0  0  0  0  0  0  0  0
   -7.4050   -4.1132    0.4211 H   0  0  0  0  0  0  0  0  0  0  0  0
  1  2  1  0  0  0  0
  1  3  1  0  0  0  0
  1 44  1  0  0  0  0
  1142  1  0  0  0  0
  3  4  1  0  0  0  0
  3  5  1  0  0  0  0
  3  6  1  0  0  0  0
  6  7  1  0  0  0  0
  6  8  1  0  0  0  0
  6 46  1  0  0  0  0
  8  9  1  0  0  0  0
  8 10  1  0  0  0  0
  8 11  1  0  0  0  0
 11 12  1  0  0  0  0
 11 13  1  0  0  0  0
 11 48  1  0  0  0  0
 13 14  1  0  0  0  0
 13 15  1  0  0  0  0
 13 16  1  0  0  0  0
 16 17  1  0  0  0  0
 16 18  1  0  0  0  0
 16 50  1  0  0  0  0
 18 19  1  0  0  0  0
 18 20  1  0  0  0  0
 18 21  1  0  0  0  0
 21 22  1  0  0  0  0
 21 23  1  0  0  0  0
 21 52  1  0  0  0  0
 23 24  1  0  0  0  0
 23 25  1  0  0  0  0
 23 26  1  0  0  0  0
 26 27  1  0  0  0  0
 26 28  1  0  0  0  0
 26 54  1  0  0  0  0
 28 29  1  0  0  0  0
 28 30  1  0  0  0  0
 28 31  1  0  0  0  0
 31 32  1  0  0  0  0
 31 33  1  0  0  0  0
 31 56  1  0  0  0  0
 33 34  1  0  0  0  0
 33 35  1  0  0  0  0
 33 36  1  0  0  0  0
 36 37  1  0  0  0  0
 36 38  1  0  0  0  0
 36 58  1  0  0  0  0
 38 39  1  0  0  0  0
 38 40  1  0  0  0  0
 38 41  1  0  0  0  0
 41 42  1  0  0  0  0
 41 43  1  0  0  0  0
 41 60  1  0  0  0  0
 44 45  1  0  0  0  0
 46 47  1  0  0  0  0
 48 49  1  0  0  0  0
 50 51  1  0  0  0  0
 52 53  1  0  0  0  0
 54 55  1  0  0  0  0
 56 57  1  0  0  0  0
 58 59  1  0  0  0  0
 60 61  1  0  0  0  0
 62 63  1  0  0  0  0
 62 64  1  0  0  0  0
 62105  1  0  0  0  0
 62141  1  0  0  0  0
 64 65  1  0  0  0  0
 64 66  1  0  0  0  0
 64 67  1  0  0  0  0
 67 68  1  0  0  0  0
 67 69  1  0  0  0  0
 67107  1  0  0  0  0
 69 70  1  0  0  0  0
 69 71  1  0  0  0  0
 69 72  1  0  0  0  0
 72 73  1  0  0  0  0
 72 74  1  0  0  0  0
 72109  1  0  0  0  0
 74 75  1  0  0  0  0
 74 76  1  0  0  0  0
 74 77  1  0  0  0  0
 77 78  1  0  0  0  0
 77 79  1  0  0  0  0
 77111  1  0  0  0  0
 79 80  1  0  0  0  0
 79 81  1  0  0  0  0
 79 82  1  0  0  0  0
 82 83  1  0  0  0  0
 82 84  1  0  0  0  0
 82113  1  0  0  0  0
 84 85  1  0  0  0  0
 84 86  1  0  0  0  0
 84 87  1  0  0  0  0
 87 88  1  0  0  0  0
 87 89  1  0  0  0  0
 87115  1  0  0  0  0
 89 90  1  0  0  0  0
 89 91  1  0  0  0  0
 89 92  1  0  0  0  0
 92 93  1  0  0  0  0
 92 94  1  0  0  0  0
 92117  1  0  0  0  0
 94 95  1  0  0  0  0
 94 96  1  0  0  0  0
 94 97  1  0  0  0  0
 97 98  1  0  0  0  0
 97 99  1  0  0  0  0
 97119  1  0  0  0  0
 99100  1  0  0  0  0
 99101  1  0  0  0  0
 99102  1  0  0  0  0
102103  1  0  0  0  0
102104  1  0  0  0  0
102121  1  0  0  0  0
105106  1  0  0  0  0
107108  1  0  0  0  0
109110  1  0  0  0  0
111112  1  0  0  0  0
113114  1  0  0  0  0
115116  1  0  0  0  0
117118  1  0  0  0  0
119120  1  0  0  0  0
121122  1  0  0  0  0
123127  1  0  0  0  0
123128  1  0  0  0  0
123129  1  0  0  0  0
126134  1  0  0  0  0
