# Supplementary material for: Structure of Hybrid Interpolymeric Complexes of Polyvinyl Alcohol and Halides of Second Group Elements
Source: Hindawi journal article supplement (doi:10.1155/2017/4931082), 2017-01-01
Supplement: f1 [file 4931082.f1.zip › 2PVAZnCl2.mol]

Title 2PVA8,5-6ZnCl2

Created by GaussView 5.0.8
142137  0  0  0  0  0  0  0  0  0    0
    9.5409   -3.6665   -1.2735 C   0  0  0  0  0  0  0  0  0  0  0  0
   10.4497   -4.2747   -1.3017 H   0  0  0  0  0  0  0  0  0  0  0  0
    8.3528   -4.4989   -0.8107 C   0  0  0  0  0  0  0  0  0  0  0  0
    8.5736   -4.8911    0.1892 H   0  0  0  0  0  0  0  0  0  0  0  0
    8.2328   -5.3517   -1.4898 H   0  0  0  0  0  0  0  0  0  0  0  0
    7.0544   -3.6891   -0.7728 C   0  0  0  0  0  0  0  0  0  0  0  0
    7.2503   -2.7520   -0.2502 H   0  0  0  0  0  0  0  0  0  0  0  0
    5.8951   -4.3871   -0.0667 C   0  0  0  0  0  0  0  0  0  0  0  0
    6.2453   -4.8485    0.8630 H   0  0  0  0  0  0  0  0  0  0  0  0
    5.5453   -5.1978   -0.7188 H   0  0  0  0  0  0  0  0  0  0  0  0
    4.7206   -3.4317    0.2708 C   0  0  0  0  0  0  0  0  0  0  0  0
    4.8617   -3.0024    1.2658 H   0  0  0  0  0  0  0  0  0  0  0  0
    3.3902   -4.1961    0.2145 C   0  0  0  0  0  0  0  0  0  0  0  0
    3.4518   -4.9869    0.9759 H   0  0  0  0  0  0  0  0  0  0  0  0
    3.2958   -4.7017   -0.7553 H   0  0  0  0  0  0  0  0  0  0  0  0
    2.1077   -3.3972    0.4488 C   0  0  0  0  0  0  0  0  0  0  0  0
    2.2467   -2.6693    1.2541 H   0  0  0  0  0  0  0  0  0  0  0  0
    0.9103   -4.3090    0.7995 C   0  0  0  0  0  0  0  0  0  0  0  0
    0.9898   -4.5678    1.8615 H   0  0  0  0  0  0  0  0  0  0  0  0
    0.9564   -5.2415    0.2228 H   0  0  0  0  0  0  0  0  0  0  0  0
   -0.4321   -3.6326    0.5075 C   0  0  0  0  0  0  0  0  0  0  0  0
   -0.4059   -2.6067    0.9025 H   0  0  0  0  0  0  0  0  0  0  0  0
   -1.6797   -4.3166    1.0797 C   0  0  0  0  0  0  0  0  0  0  0  0
   -1.5497   -4.4523    2.1605 H   0  0  0  0  0  0  0  0  0  0  0  0
   -1.8083   -5.3068    0.6236 H   0  0  0  0  0  0  0  0  0  0  0  0
   -2.9312   -3.4584    0.8396 C   0  0  0  0  0  0  0  0  0  0  0  0
   -2.7619   -2.4768    1.3075 H   0  0  0  0  0  0  0  0  0  0  0  0
   -4.2268   -4.0671    1.3852 C   0  0  0  0  0  0  0  0  0  0  0  0
   -4.0652   -4.4525    2.4013 H   0  0  0  0  0  0  0  0  0  0  0  0
   -4.4964   -4.9220    0.7522 H   0  0  0  0  0  0  0  0  0  0  0  0
   -5.4066   -3.0875    1.4623 C   0  0  0  0  0  0  0  0  0  0  0  0
   -5.2029   -2.3195    2.2143 H   0  0  0  0  0  0  0  0  0  0  0  0
   -6.7305   -3.8263    1.7989 C   0  0  0  0  0  0  0  0  0  0  0  0
   -6.8769   -3.7883    2.8840 H   0  0  0  0  0  0  0  0  0  0  0  0
   -6.6400   -4.8818    1.5147 H   0  0  0  0  0  0  0  0  0  0  0  0
   -7.9632   -3.2605    1.0934 C   0  0  0  0  0  0  0  0  0  0  0  0
   -8.0684   -2.1933    1.3303 H   0  0  0  0  0  0  0  0  0  0  0  0
   -9.2804   -3.9670    1.4217 C   0  0  0  0  0  0  0  0  0  0  0  0
   -9.4282   -3.9965    2.5088 H   0  0  0  0  0  0  0  0  0  0  0  0
   -9.2264   -5.0029    1.0630 H   0  0  0  0  0  0  0  0  0  0  0  0
  -10.4798   -3.2472    0.7941 C   0  0  0  0  0  0  0  0  0  0  0  0
  -11.3988   -3.8216    0.9742 H   0  0  0  0  0  0  0  0  0  0  0  0
  -10.5939   -2.2594    1.2551 H   0  0  0  0  0  0  0  0  0  0  0  0
    9.7526   -2.5844   -0.3242 O   0  0  0  0  0  0  0  0  0  0  0  0
   10.6780   -2.2768   -0.3488 H   0  0  0  0  0  0  0  0  0  0  0  0
    6.5938   -3.3938   -2.1111 O   0  0  0  0  0  0  0  0  0  0  0  0
    7.0341   -2.5741   -2.4069 H   0  0  0  0  0  0  0  0  0  0  0  0
    4.7075   -2.2697   -0.6135 O   0  0  0  0  0  0  0  0  0  0  0  0
    5.0609   -2.5674   -1.4866 H   0  0  0  0  0  0  0  0  0  0  0  0
    1.8178   -2.6163   -0.7594 O   0  0  0  0  0  0  0  0  0  0  0  0
    0.9034   -2.8824   -1.1018 H   0  0  0  0  0  0  0  0  0  0  0  0
   -0.4922   -3.5874   -0.9387 O   0  0  0  0  0  0  0  0  0  0  0  0
   -1.3931   -3.2648   -1.1757 H   0  0  0  0  0  0  0  0  0  0  0  0
   -3.0409   -3.2966   -0.5884 O   0  0  0  0  0  0  0  0  0  0  0  0
   -3.8198   -2.7393   -0.7576 H   0  0  0  0  0  0  0  0  0  0  0  0
   -5.5164   -2.3263    0.1916 O   0  0  0  0  0  0  0  0  0  0  0  0
   -6.3418   -2.6946   -0.2982 H   0  0  0  0  0  0  0  0  0  0  0  0
   -7.6823   -3.4164   -0.3234 O   0  0  0  0  0  0  0  0  0  0  0  0
   -8.5263   -3.1782   -0.7874 H   0  0  0  0  0  0  0  0  0  0  0  0
  -10.2645   -3.1114   -0.6222 O   0  0  0  0  0  0  0  0  0  0  0  0
  -10.6735   -2.2762   -0.9283 H   0  0  0  0  0  0  0  0  0  0  0  0
   10.2070    3.8455    2.3462 C   0  0  0  0  0  0  0  0  0  0  0  0
   10.7324    3.0498    1.7912 H   0  0  0  0  0  0  0  0  0  0  0  0
    9.0427    4.3760    1.4960 C   0  0  0  0  0  0  0  0  0  0  0  0
    9.4425    4.9245    0.6320 H   0  0  0  0  0  0  0  0  0  0  0  0
    8.4643    5.0873    2.1007 H   0  0  0  0  0  0  0  0  0  0  0  0
    8.1089    3.2791    0.9712 C   0  0  0  0  0  0  0  0  0  0  0  0
    8.6885    2.6300    0.2941 H   0  0  0  0  0  0  0  0  0  0  0  0
    6.9122    3.8751    0.2138 C   0  0  0  0  0  0  0  0  0  0  0  0
    7.2777    4.6610   -0.4620 H   0  0  0  0  0  0  0  0  0  0  0  0
    6.2448    4.3579    0.9374 H   0  0  0  0  0  0  0  0  0  0  0  0
    6.1046    2.9045   -0.6559 C   0  0  0  0  0  0  0  0  0  0  0  0
    6.7518    2.4569   -1.4131 H   0  0  0  0  0  0  0  0  0  0  0  0
    4.8874    3.6058   -1.3249 C   0  0  0  0  0  0  0  0  0  0  0  0
    4.7810    3.2703   -2.3621 H   0  0  0  0  0  0  0  0  0  0  0  0
    5.0830    4.6845   -1.3472 H   0  0  0  0  0  0  0  0  0  0  0  0
    3.5601    3.3327   -0.6088 C   0  0  0  0  0  0  0  0  0  0  0  0
    3.2632    2.3057   -0.8541 H   0  0  0  0  0  0  0  0  0  0  0  0
    2.4014    4.2556   -1.0137 C   0  0  0  0  0  0  0  0  0  0  0  0
    2.4004    4.3943   -2.1022 H   0  0  0  0  0  0  0  0  0  0  0  0
    2.5398    5.2395   -0.5476 H   0  0  0  0  0  0  0  0  0  0  0  0
    1.0629    3.6351   -0.6002 C   0  0  0  0  0  0  0  0  0  0  0  0
    0.9698    2.6818   -1.1381 H   0  0  0  0  0  0  0  0  0  0  0  0
   -0.1743    4.4936   -0.9001 C   0  0  0  0  0  0  0  0  0  0  0  0
   -0.0697    4.9918   -1.8733 H   0  0  0  0  0  0  0  0  0  0  0  0
   -0.2360    5.2781   -0.1359 H   0  0  0  0  0  0  0  0  0  0  0  0
   -1.4782    3.6815   -0.9362 C   0  0  0  0  0  0  0  0  0  0  0  0
   -1.5165    3.0947   -1.8604 H   0  0  0  0  0  0  0  0  0  0  0  0
   -2.7332    4.5709   -0.8348 C   0  0  0  0  0  0  0  0  0  0  0  0
   -2.9017    5.0249   -1.8175 H   0  0  0  0  0  0  0  0  0  0  0  0
   -2.5546    5.3888   -0.1253 H   0  0  0  0  0  0  0  0  0  0  0  0
   -3.9889    3.8201   -0.3718 C   0  0  0  0  0  0  0  0  0  0  0  0
   -4.0762    2.8832   -0.9407 H   0  0  0  0  0  0  0  0  0  0  0  0
   -5.2830    4.6263   -0.5485 C   0  0  0  0  0  0  0  0  0  0  0  0
   -5.2499    5.0816   -1.5474 H   0  0  0  0  0  0  0  0  0  0  0  0
   -5.3179    5.4403    0.1849 H   0  0  0  0  0  0  0  0  0  0  0  0
   -6.5716    3.7906   -0.4605 C   0  0  0  0  0  0  0  0  0  0  0  0
   -6.4058    2.8348   -0.9775 H   0  0  0  0  0  0  0  0  0  0  0  0
   -7.7876    4.4772   -1.0992 C   0  0  0  0  0  0  0  0  0  0  0  0
   -7.5156    4.9139   -2.0671 H   0  0  0  0  0  0  0  0  0  0  0  0
   -8.1035    5.3006   -0.4460 H   0  0  0  0  0  0  0  0  0  0  0  0
   -8.9459    3.5050   -1.3380 C   0  0  0  0  0  0  0  0  0  0  0  0
   -9.8565    4.0386   -1.6250 H   0  0  0  0  0  0  0  0  0  0  0  0
   -8.6922    2.7994   -2.1355 H   0  0  0  0  0  0  0  0  0  0  0  0
    9.7989    3.4028    3.6284 O   0  0  0  0  0  0  0  0  0  0  0  0
    9.0615    2.7886    3.4615 H   0  0  0  0  0  0  0  0  0  0  0  0
    7.6743    2.5154    2.1077 O   0  0  0  0  0  0  0  0  0  0  0  0
    7.1982    1.7315    1.7896 H   0  0  0  0  0  0  0  0  0  0  0  0
    5.6656    1.7535    0.1549 O   0  0  0  0  0  0  0  0  0  0  0  0
    4.9510    2.1303    0.7442 H   0  0  0  0  0  0  0  0  0  0  0  0
    3.8060    3.4137    0.8086 O   0  0  0  0  0  0  0  0  0  0  0  0
    2.9349    3.2532    1.2313 H   0  0  0  0  0  0  0  0  0  0  0  0
    1.1456    3.3759    0.8119 O   0  0  0  0  0  0  0  0  0  0  0  0
    0.3417    2.8946    1.0723 H   0  0  0  0  0  0  0  0  0  0  0  0
   -1.4733    2.6754    0.1446 O   0  0  0  0  0  0  0  0  0  0  0  0
   -2.2227    2.9298    0.7701 H   0  0  0  0  0  0  0  0  0  0  0  0
   -3.7207    3.5091    1.0191 O   0  0  0  0  0  0  0  0  0  0  0  0
   -4.2699    2.7531    1.3195 H   0  0  0  0  0  0  0  0  0  0  0  0
   -6.9667    3.5333    0.9068 O   0  0  0  0  0  0  0  0  0  0  0  0
   -6.4994    2.7520    1.2637 H   0  0  0  0  0  0  0  0  0  0  0  0
   -9.2477    2.7332   -0.1455 O   0  0  0  0  0  0  0  0  0  0  0  0
   -8.5939    3.0022    0.5520 H   0  0  0  0  0  0  0  0  0  0  0  0
  -10.9752   -0.0487   -1.4656 Cl  0  0  0  0  0  0  0  0  0  0  0  0
   -9.1230    0.2005    2.0134 Cl  0  0  0  0  0  0  0  0  0  0  0  0
   -7.2412    0.1503   -1.3287 Cl  0  0  0  0  0  0  0  0  0  0  0  0
   -5.2549    0.8696    1.9139 Cl  0  0  0  0  0  0  0  0  0  0  0  0
   -3.4808    0.1090   -1.2331 Cl  0  0  0  0  0  0  0  0  0  0  0  0
   -1.1308   -0.1369    1.9359 Cl  0  0  0  0  0  0  0  0  0  0  0  0
    7.4531   -0.3111   -1.7976 Cl  0  0  0  0  0  0  0  0  0  0  0  0
   10.7699    0.2181    0.3413 Cl  0  0  0  0  0  0  0  0  0  0  0  0
    7.0263   -0.8673    1.5271 Cl  0  0  0  0  0  0  0  0  0  0  0  0
    3.8608   -0.0003   -2.3619 Cl  0  0  0  0  0  0  0  0  0  0  0  0
    3.2361   -0.0753    1.0915 Cl  0  0  0  0  0  0  0  0  0  0  0  0
    0.1696    0.1231   -1.6473 Cl  0  0  0  0  0  0  0  0  0  0  0  0
   10.9279    4.6540    2.5152 H   0  0  0  0  0  0  0  0  0  0  0  0
    9.3731   -3.2425   -2.2706 H   0  0  0  0  0  0  0  0  0  0  0  0
    8.8198   -0.7485    0.0692 Zn  0  0  0  0  0  0  0  0  0  0  0  0
    5.3593   -0.2092   -0.3060 Zn  0  0  0  0  0  0  0  0  0  0  0  0
    2.2349   -0.7097   -0.8850 Zn  0  0  0  0  0  0  0  0  0  0  0  0
   -1.5134    0.6374   -0.0784 Zn  0  0  0  0  0  0  0  0  0  0  0  0
   -5.4861   -0.3342    0.0457 Zn  0  0  0  0  0  0  0  0  0  0  0  0
   -9.4000    0.7222   -0.1148 Zn  0  0  0  0  0  0  0  0  0  0  0  0
  1  2  1  0  0  0  0
  1  3  1  0  0  0  0
  1 44  1  0  0  0  0
  1136  1  0  0  0  0
  3  4  1  0  0  0  0
  3  5  1  0  0  0  0
  3  6  1  0  0  0  0
  6  7  1  0  0  0  0
  6  8  1  0  0  0  0
  6 46  1  0  0  0  0
  8  9  1  0  0  0  0
  8 10  1  0  0  0  0
  8 11  1  0  0  0  0
 11 12  1  0  0  0  0
 11 13  1  0  0  0  0
 11 48  1  0  0  0  0
 13 14  1  0  0  0  0
 13 15  1  0  0  0  0
 13 16  1  0  0  0  0
 16 17  1  0  0  0  0
 16 18  1  0  0  0  0
 16 50  1  0  0  0  0
 18 19  1  0  0  0  0
 18 20  1  0  0  0  0
 18 21  1  0  0  0  0
 21 22  1  0  0  0  0
 21 23  1  0  0  0  0
 21 52  1  0  0  0  0
 23 24  1  0  0  0  0
 23 25  1  0  0  0  0
 23 26  1  0  0  0  0
 26 27  1  0  0  0  0
 26 28  1  0  0  0  0
 26 54  1  0  0  0  0
 28 29  1  0  0  0  0
 28 30  1  0  0  0  0
 28 31  1  0  0  0  0
 31 32  1  0  0  0  0
 31 33  1  0  0  0  0
 31 56  1  0  0  0  0
 33 34  1  0  0  0  0
 33 35  1  0  0  0  0
 33 36  1  0  0  0  0
 36 37  1  0  0  0  0
 36 38  1  0  0  0  0
 36 58  1  0  0  0  0
 38 39  1  0  0  0  0
 38 40  1  0  0  0  0
 38 41  1  0  0  0  0
 41 42  1  0  0  0  0
 41 43  1  0  0  0  0
 41 60  1  0  0  0  0
 44 45  1  0  0  0  0
 46 47  1  0  0  0  0
 48 49  1  0  0  0  0
 50 51  1  0  0  0  0
 50139  1  0  0  0  0
 52 53  1  0  0  0  0
 54 55  1  0  0  0  0
 56141  1  0  0  0  0
 58 59  1  0  0  0  0
 60 61  1  0  0  0  0
 62 63  1  0  0  0  0
 62 64  1  0  0  0  0
 62105  1  0  0  0  0
 62135  1  0  0  0  0
 64 65  1  0  0  0  0
 64 66  1  0  0  0  0
 64 67  1  0  0  0  0
 67 68  1  0  0  0  0
 67 69  1  0  0  0  0
 67107  1  0  0  0  0
 69 70  1  0  0  0  0
 69 71  1  0  0  0  0
 69 72  1  0  0  0  0
 72 73  1  0  0  0  0
 72 74  1  0  0  0  0
 72109  1  0  0  0  0
 74 75  1  0  0  0  0
 74 76  1  0  0  0  0
 74 77  1  0  0  0  0
 77 78  1  0  0  0  0
 77 79  1  0  0  0  0
 77111  1  0  0  0  0
 79 80  1  0  0  0  0
 79 81  1  0  0  0  0
 79 82  1  0  0  0  0
 82 83  1  0  0  0  0
 82 84  1  0  0  0  0
 82113  1  0  0  0  0
 84 85  1  0  0  0  0
 84 86  1  0  0  0  0
 84 87  1  0  0  0  0
 87 88  1  0  0  0  0
 87 89  1  0  0  0  0
 87115  1  0  0  0  0
 89 90  1  0  0  0  0
 89 91  1  0  0  0  0
 89 92  1  0  0  0  0
 92 93  1  0  0  0  0
 92 94  1  0  0  0  0
 92117  1  0  0  0  0
 94 95  1  0  0  0  0
 94 96  1  0  0  0  0
 94 97  1  0  0  0  0
 97 98  1  0  0  0  0
 97 99  1  0  0  0  0
 97119  1  0  0  0  0
 99100  1  0  0  0  0
 99101  1  0  0  0  0
 99102  1  0  0  0  0
102103  1  0  0  0  0
102104  1  0  0  0  0
102121  1  0  0  0  0
105106  1  0  0  0  0
107108  1  0  0  0  0
109110  1  0  0  0  0
111112  1  0  0  0  0
113114  1  0  0  0  0
115116  1  0  0  0  0
117118  1  0  0  0  0
119120  1  0  0  0  0
121122  1  0  0  0  0
121142  1  0  0  0  0
123142  1  0  0  0  0
124142  1  0  0  0  0
125141  1  0  0  0  0
126141  1  0  0  0  0
127140  1  0  0  0  0
128140  1  0  0  0  0
129137  1  0  0  0  0
130137  1  0  0  0  0
131137  1  0  0  0  0
132139  1  0  0  0  0
133139  1  0  0  0  0
134139  1  0  0  0  0
134140  1  0  0  0  0
